# Supplementary material
Source: PubMed Central journal article supplement (PMC5885190)
Supplement: jamaneurol-75-478-s001.pdf [file jamaneurol-75-478-s001.pdf]

## Supplementary Online Content

Hacohen Y, Wong YY, Lechner C, et al. Disease course and treatment responses in children with relapsing myelin oligodendrocyte glycoprotein antibody–associated disease. *JAMA Neurol*. Published online January 5, 2014. doi:10.1001/jamaneurol.2014.1238

**eTable.** Clinical Phenotypes of All Treated Patients

This supplementary material has been provided by the authors to give readers additional information about their work.

**eTable.** Clinical Phenotypes of All Treated Patients

|            |         |            |         |
|------------|---------|------------|---------|
| Patient 1  | MDEM    | Patient 27 | NMOSD   |
| Patient 2  | NMOSD   | Patient 28 | NMOSD   |
| Patient 3  | NMOSD   | Patient 29 | NMOSD   |
| Patient 4  | MDEM    | Patient 30 | ADEM-ON |
| Patient 5  | NMOSD   | Patient 31 | NMOSD   |
| Patient 6  | MDEM    | Patient 32 | ADEM-ON |
| Patient 7  | MDEM    | Patient 33 | ADEM-ON |
| Patient 8  | NMOSD   | Patient 34 | RION    |
| Patient 9  | NMOSD   | Patient 35 | NMOSD   |
| Patient 10 | RION    | Patient 36 | ADEM-ON |
| Patient 11 | ADEM-ON | Patient 37 | MDEM    |
| Patient 12 | MDEM    | Patient 38 | RION    |
| Patient 13 | NMOSD   | Patient 39 | MDEM    |
| Patient 14 | NMOSD   | Patient 40 | RION    |
| Patient 15 | NMOSD   | Patient 41 | NMOSD   |
| Patient 16 | NMOSD   | Patient 42 | RION    |
| Patient 17 | ADEM-ON | Patient 43 | RION    |
| Patient 18 | MDEM    | Patient 44 | ADEM-ON |
| Patient 19 | RION    | Patient 45 | MDEM    |
| Patient 20 | NMOSD   | Patient 46 | NMOSD   |
| Patient 21 | NMOSD   | Patient 47 | NMOSD   |
| Patient 22 | ADEM-ON | Patient 48 | ADEM-ON |
| Patient 23 | ADEM-ON | Patient 49 | NMOSD   |
| Patient 24 | ADEM-ON | Patient 50 | NMOSD   |
| Patient 25 | MDEM    | Patient 51 | ADEM-ON |
| Patient 26 | MDEM    | Patient 52 | NMOSD   |
